# Supplementary material for: Metal–Organic-Framework-Mediated Fast Self-Assembly 3D Interconnected Lignin-Based Cryogels in Deep Eutectic Solvent for Supercapacitor Applications
Source: MDPI journal article supplement (doi:10.3390/polym15081824), 2023-04-08
Supplement: s1 [file s1]

## **Supporting Information**

# **Metal–Organic-Framework-Mediated Fast Self-Assembly 3D Interconnected Lignin-Based Cryogels in Deep Eutectic Solvent for Supercapacitor Applications**

**Rui Lou <sup>1,\*</sup>, Qihang Cao <sup>1</sup>, Taoyuan Niu <sup>1</sup>, Yiyi Zhang <sup>1</sup>, Yanan Zhang <sup>1</sup>, Guodong Wei <sup>1</sup>, Zhiwei Wang <sup>2</sup> and Xiao Zhang <sup>3,\*</sup>**

<sup>1</sup> College of Physics and Energy, Materials Institute of Atomic and Molecular Science, Shaanxi University of Science and Technology, Xi'an 710021, China

<sup>2</sup> Key Laboratory of Clean Pulp & Papermaking and Pollution Control of Guangxi, Guangxi University, Nanning 530004, China

<sup>3</sup> Voiland School of Chemical Engineering & Bioengineering, Washington State University, Richland, WA 99354, USA

\* Correspondence: [lourui@sust.edu.cn](mailto:lourui@sust.edu.cn); [x.zhang@wsu.edu](mailto:x.zhang@wsu.edu)

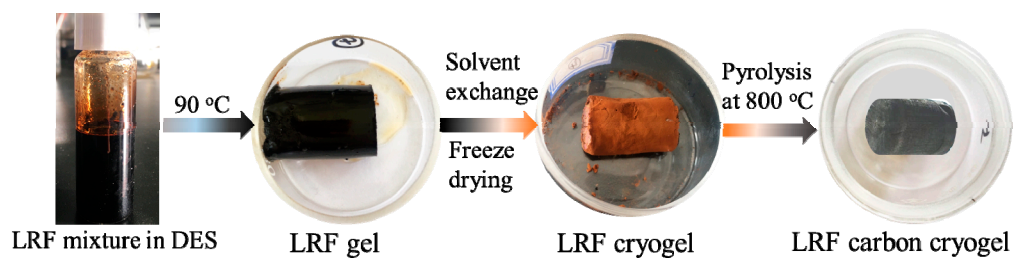

**Figure S1** Flow chart of the LRF carbon cryogels preparation.

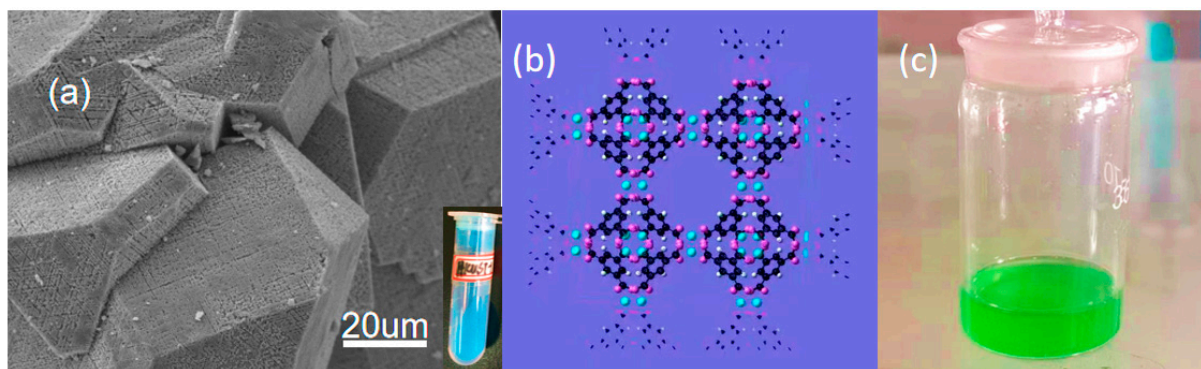

**Figure S2** A typical MOF of HKUST-1. ((a) SEM image; (b) molecular lattice structure; (c) HKUST-1 dissolved in DES ratio of 1:5 at room temperature).

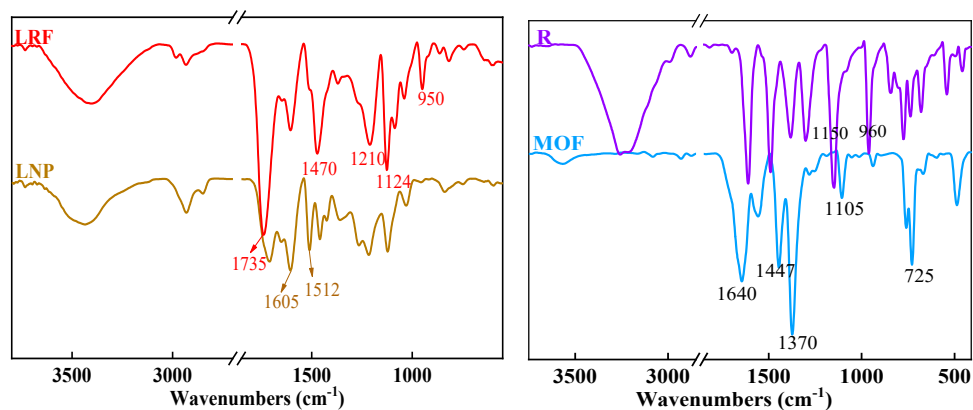

**Figure S3** FTIR spectra of the LRF cryogel (DES1:5+5%MOF), LNP, MOF and resorcinol (R).

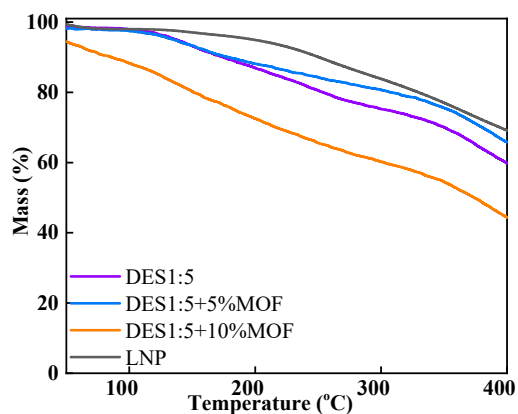

**Figure S4** Thermal stability of the LRF cryogels and LNP.

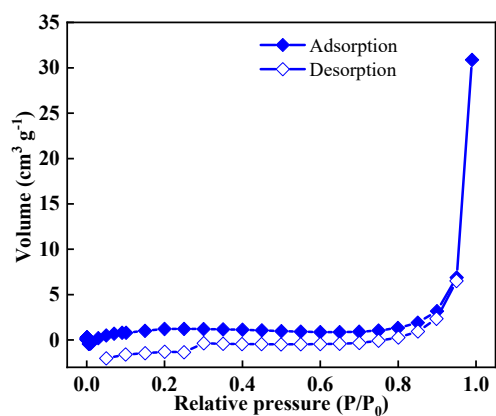

Figure S5 N<sub>2</sub> adsorption-desorption isotherms of the LRF cryogel (DES1:5+5%MOF).

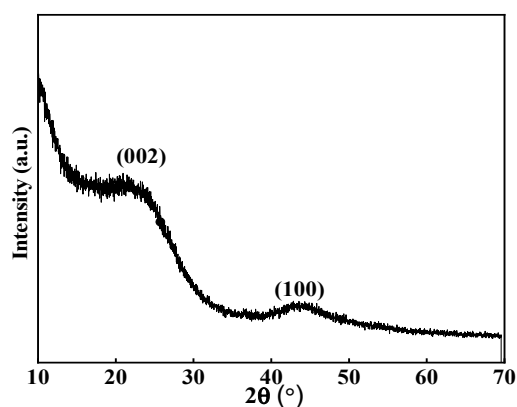

Figure S6 XRD pattern of the LRF carbon cryogel (DES1:5+5%MOF).

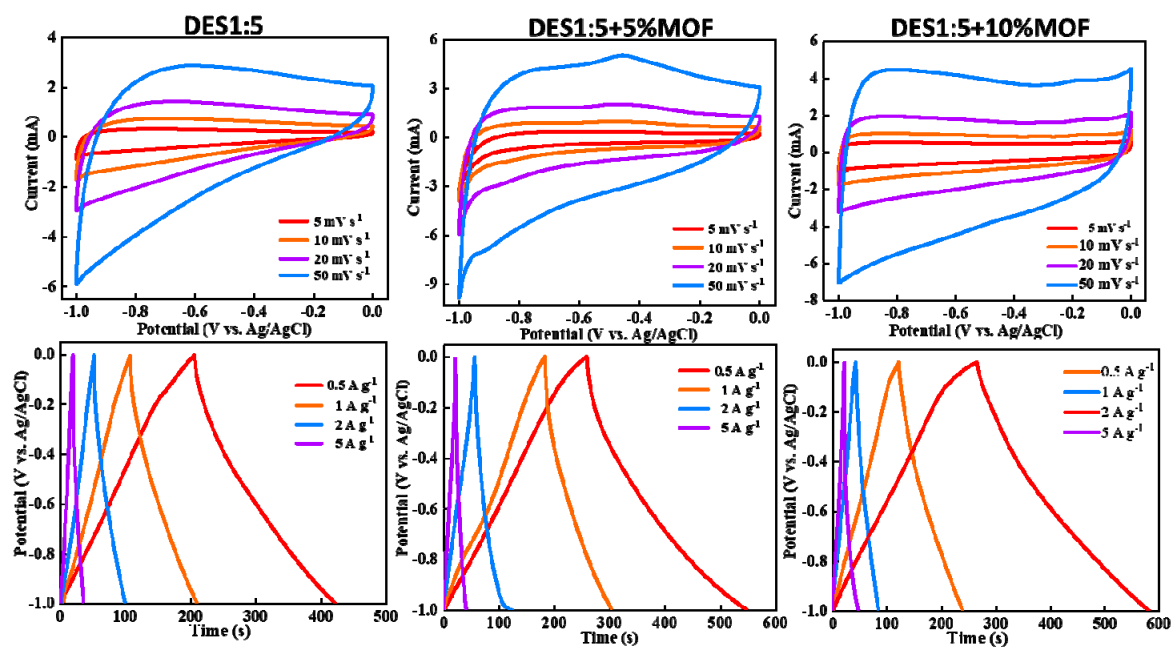

Figure S7 CV and GCD curves of the LRF carbon cryogels (DES1:5, DES1:5+5%MOF, and DES1:5+10%MOF).
